# Supplementary material
Source: PubMed Central journal article supplement (PMC2797905)

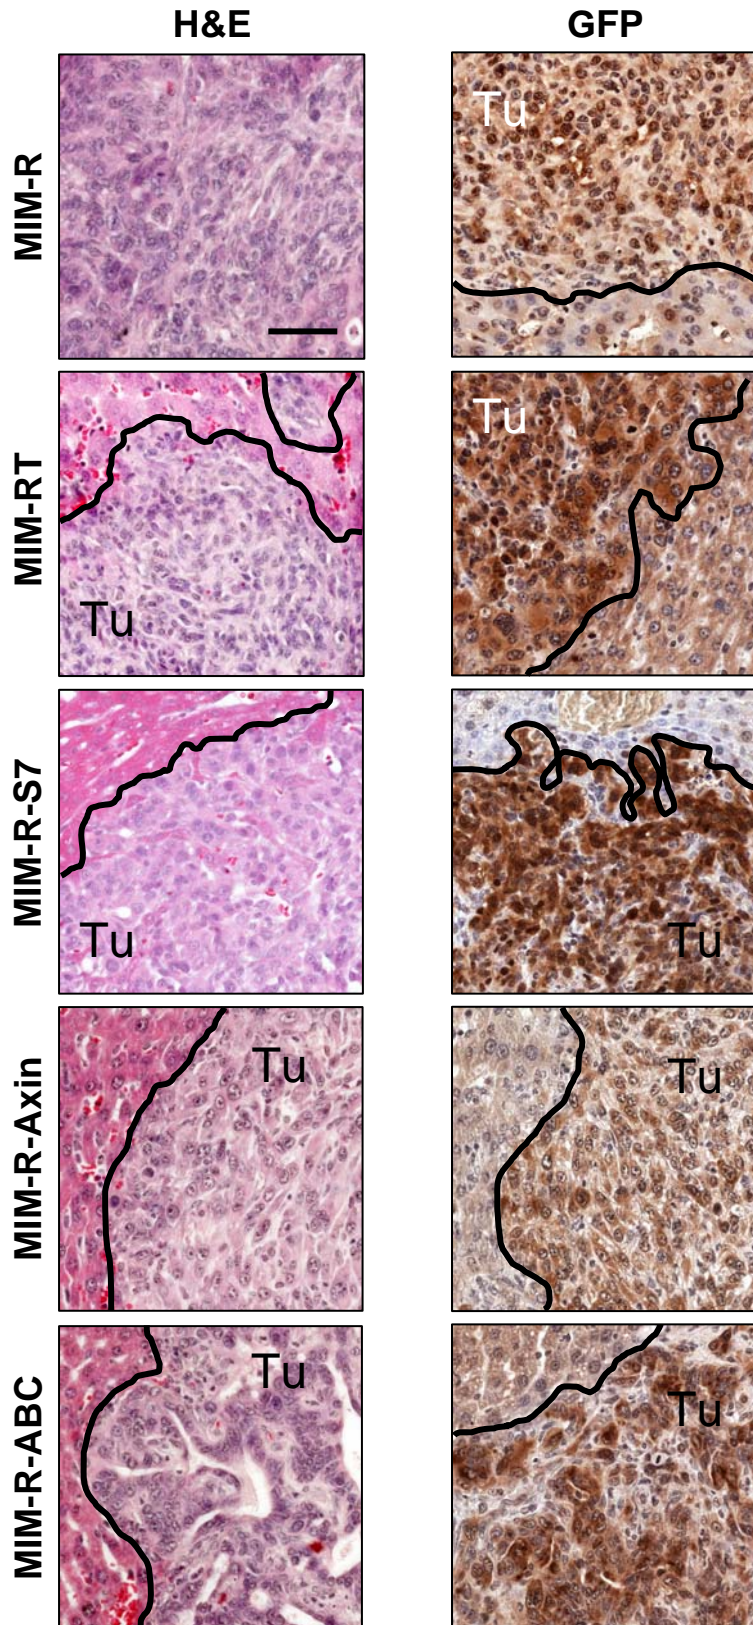

Supplement: mmc1.pdf [file mmc1.pdf]

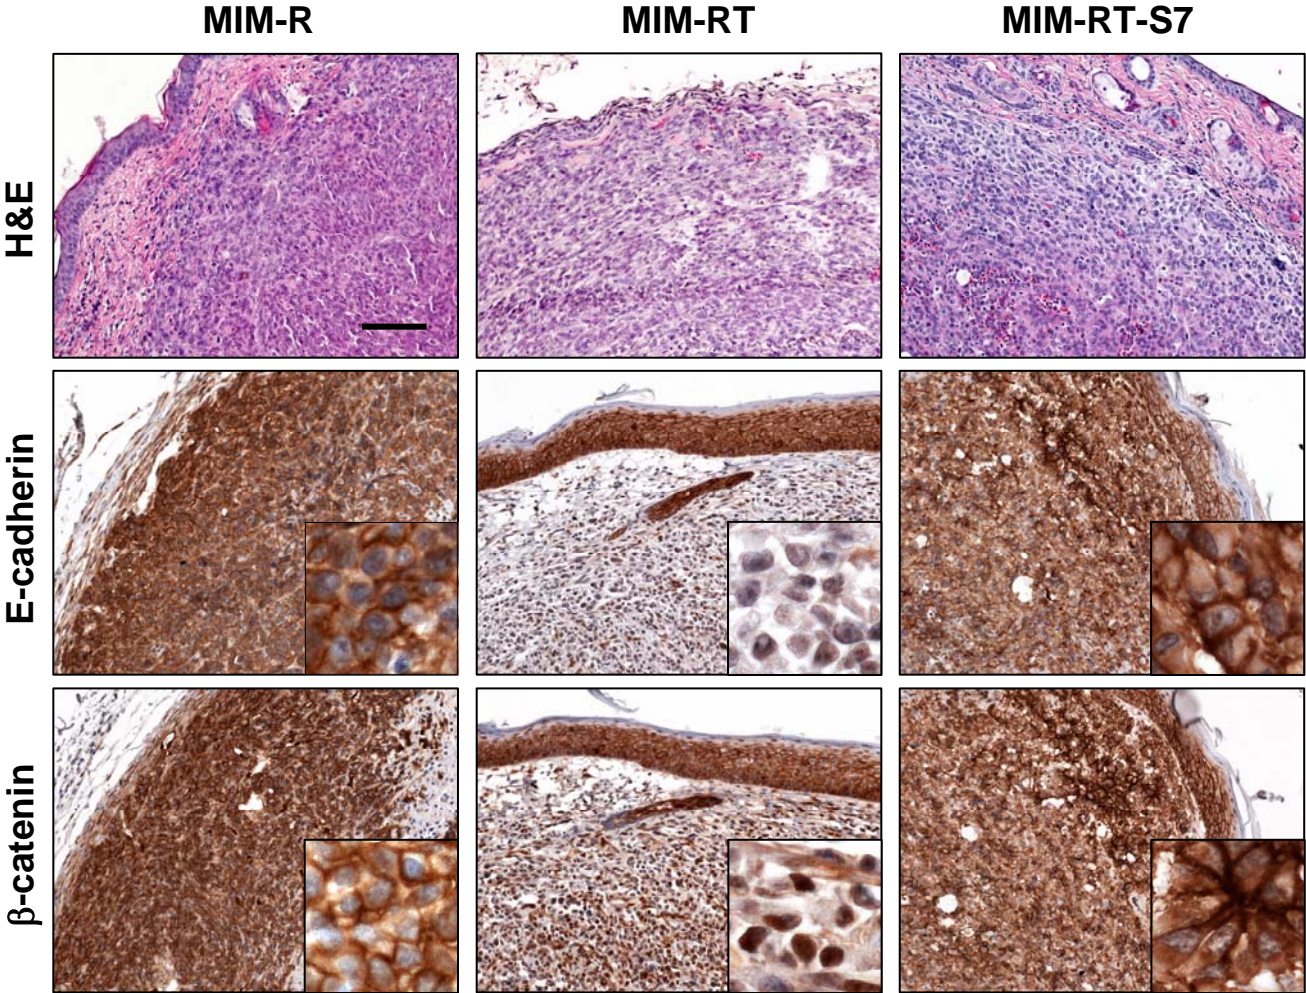

Supplement: mmc2.pdf [file mmc2.pdf]

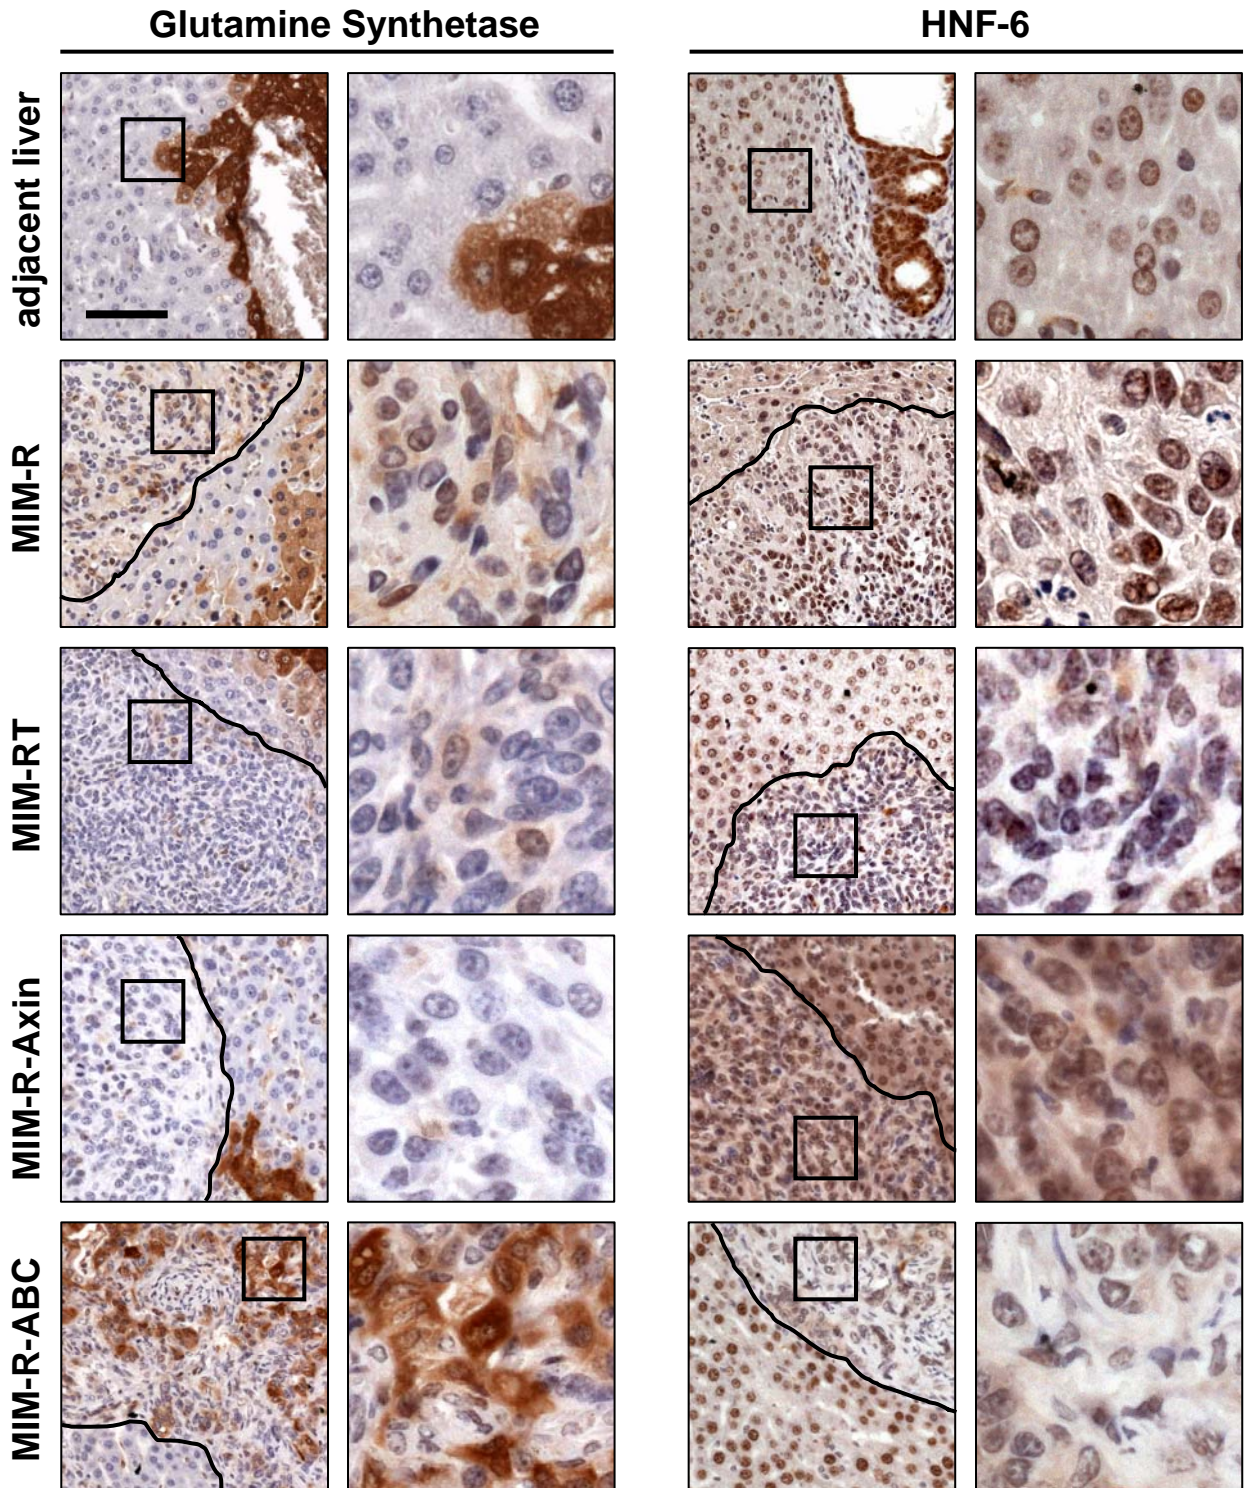

Supplement: mmc3.pdf [file mmc3.pdf]

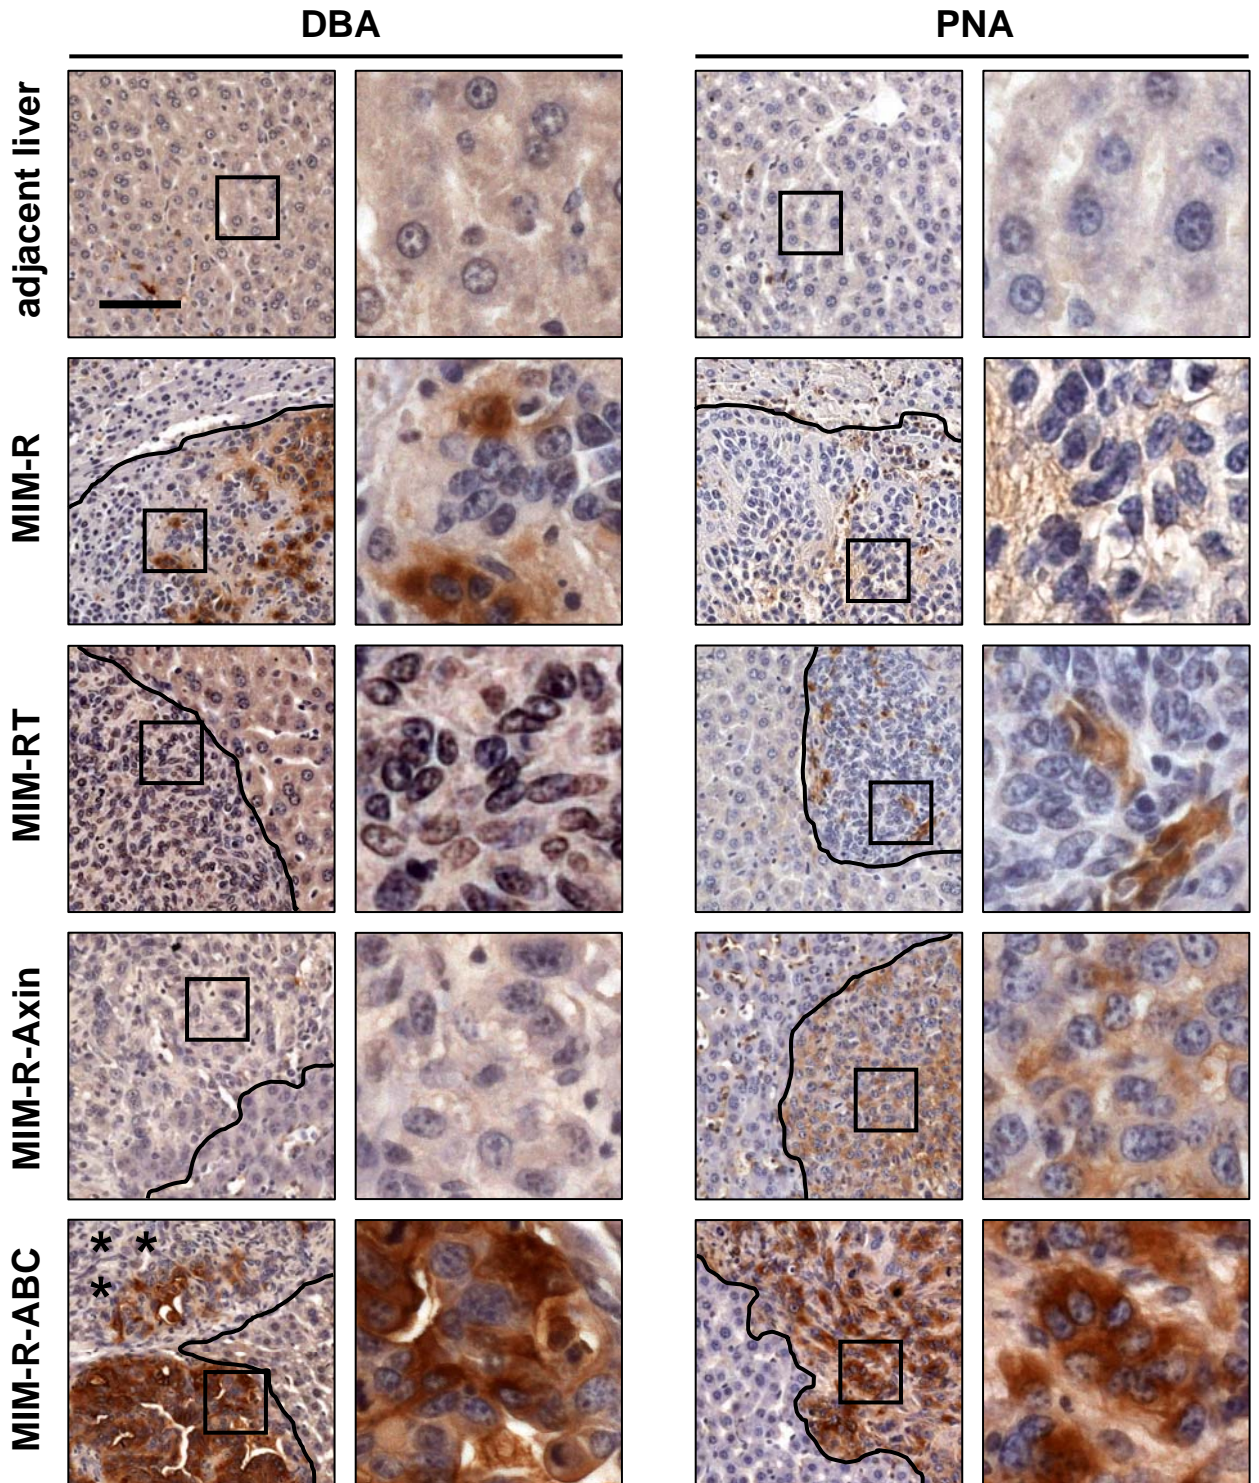

Supplement: mmc4.pdf [file mmc4.pdf]

**A**

CK 19

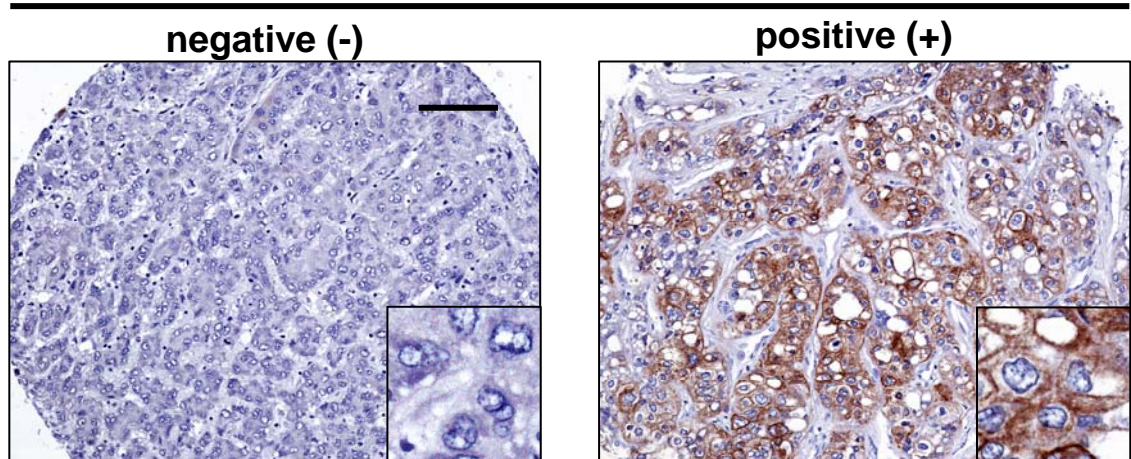

**B**

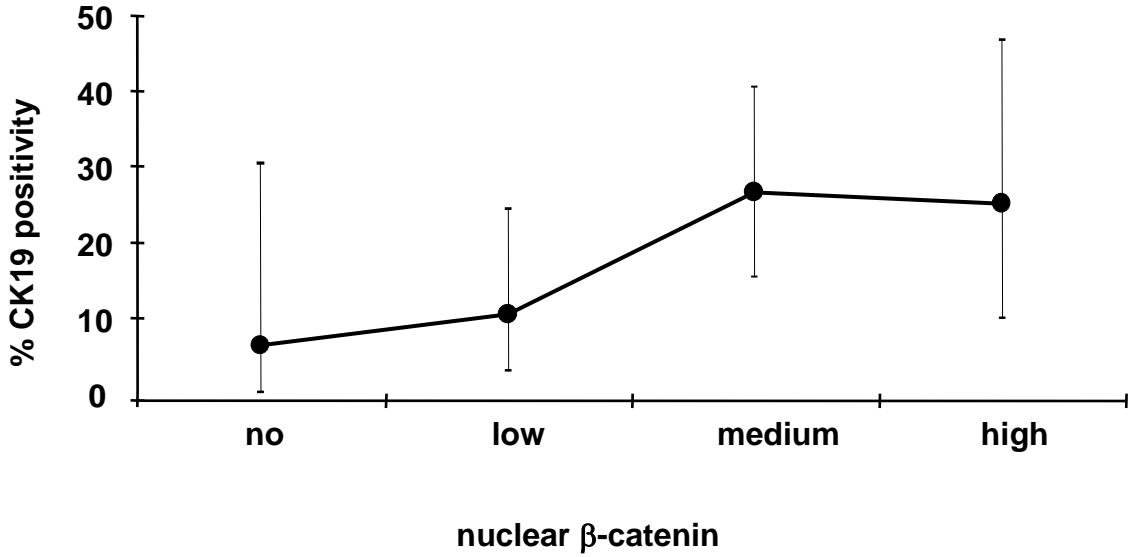

Supplement: mmc5.pdf [file mmc5.pdf]

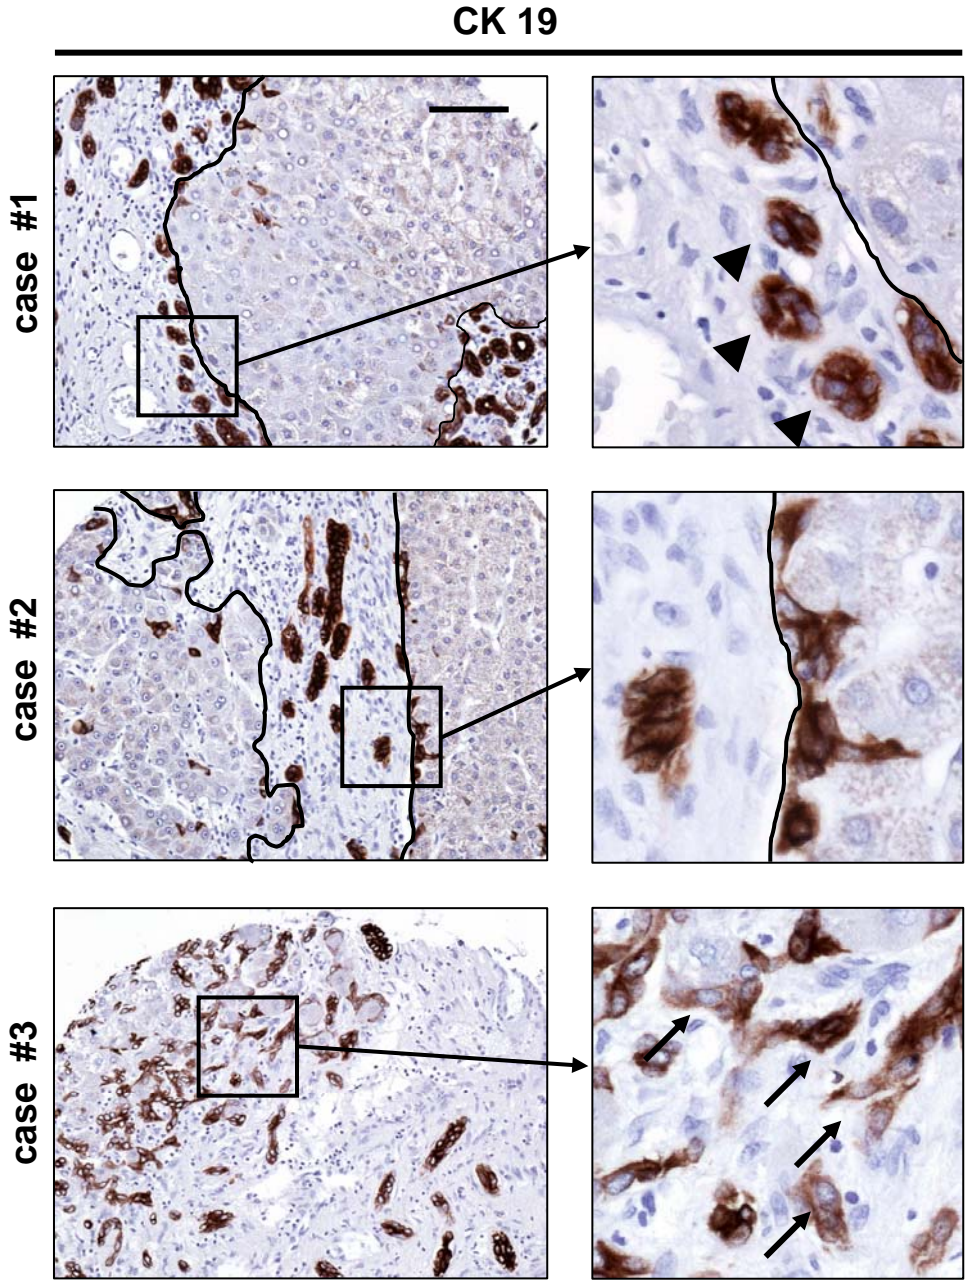

Supplement: mmc6.pdf [file mmc6.pdf]
